# Supplementary material for: Breakdown of continuum model for water transport and desalination through ultrathin graphene nanopores: insights from molecular dynamics simulations
Source: Royal Society of Chemistry journal article supplement (doi:10.1039/c9cp04364k), 2019-01-01

## ESI

### Breakdown of Continuum Model for Water Transport and Desalination through Ultrathin Graphene Nanopores: Insights from Molecular Dynamics Simulations

Pooja Sahu,<sup>†‡</sup> Sk. Musharaf Ali,<sup>\*†‡</sup>

<sup>†</sup>Bhabha Atomic Research Center, Mumbai 400085, Maharashtra, India

<sup>‡</sup>Homi Bhabha National Institute, Mumbai 400094, Maharashtra, India

**Table.S1. Forcefield for non-bonded interaction parameters of atoms in the system.**

$$U_{LJ} = 4\varepsilon \left[ \left( \frac{\sigma}{r} \right)^{12} - \left( \frac{\sigma}{r} \right)^6 \right]$$

| <b>Molecule</b> | <b>Atom symbol</b> | <b><math>\varepsilon</math> [kJ/mol]</b> | <b><math>\sigma</math> [Å]</b> |
|-----------------|--------------------|------------------------------------------|--------------------------------|
| Membrane        | C                  | 0.293                                    | 3.4                            |
| Water           | Ow                 | 0.774                                    | 3.15                           |
|                 | Hw                 | 0.000                                    | 1.00                           |
| NaCl salt       | Na                 | 0.012                                    | 3.33                           |
|                 | Cl                 | 0.492                                    | 4.42                           |

**Table.S2. Forcefield parameters for bonded interaction of atoms in the system**

$$U_{Bond} = K_b [b - b_o]^2$$

$$U_{Angle} = K_\theta [\theta - \theta_o]^2$$

| <b>Bonds</b>  | <b><math>K_b</math> [kJ/mol-Å<sup>2</sup>]</b>        | <b>Equilibrium bond length <math>b_o</math> [Å]</b>     |
|---------------|-------------------------------------------------------|---------------------------------------------------------|
| C-C           | 1960.42                                               | 1.420                                                   |
| Ow-Hw         | 1881.00                                               | 0.957                                                   |
| <b>Angles</b> | <b><math>K_\theta</math> [kJ/mol-rad<sup>2</sup>]</b> | <b>Equilibrium angle <math>\theta_o</math> [degree]</b> |
| C-C-C         | 263.34                                                | 120                                                     |
| Hw-Ow-Hw      | 229.9                                                 | 104.52                                                  |

Fig.S1. Stress correlation function of water confined in graphene nanopores vs. (i) pore size [ $P=150\text{MPa}$ ,  $C=0.2\text{M}$ ], (ii) external pressure [ $h=7\text{\AA}$ ,  $C=0.2\text{M}$ ], and (iii) salt concentration [ $h=7\text{\AA}$ ,  $P=150\text{MPa}$ ]

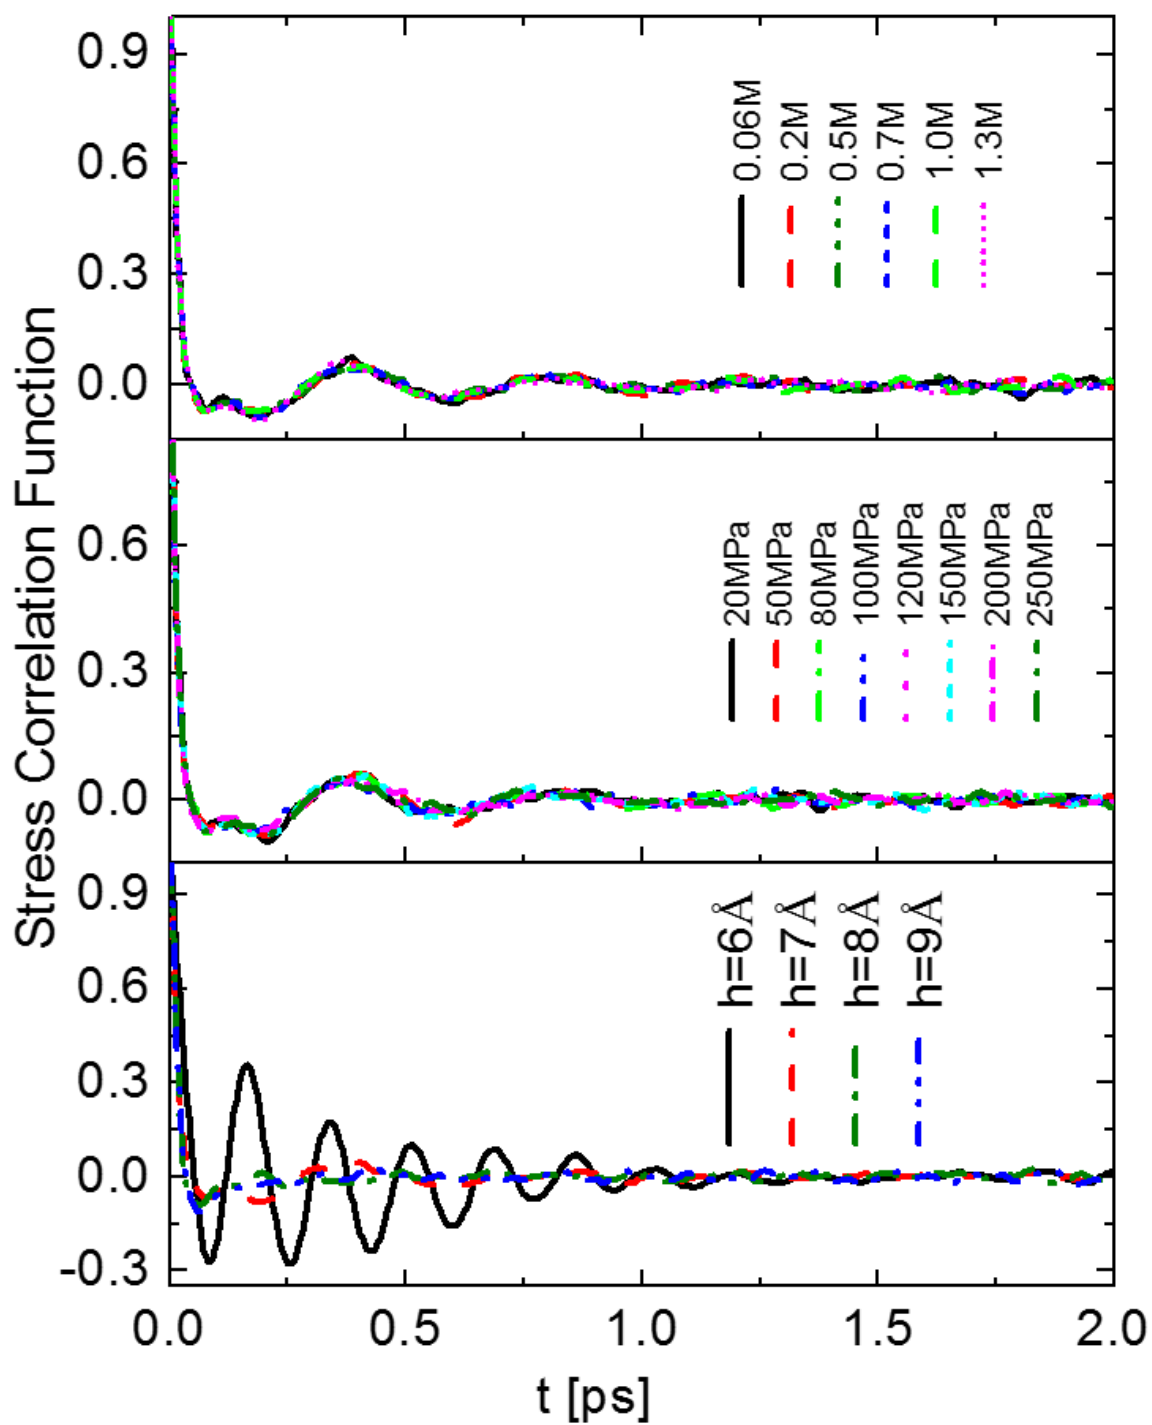

Fig.S2. Force autocorrelation function of water confined in graphene nanopores vs. (i) pore size [ $P=150\text{MPa}$ ,  $C=0.2\text{M}$ ], (ii) external pressure [ $h=7\text{\AA}$ ,  $C=0.2\text{M}$ ], and (iii) salt concentration [ $h=7\text{\AA}$ ,  $P=150\text{MPa}$ ].

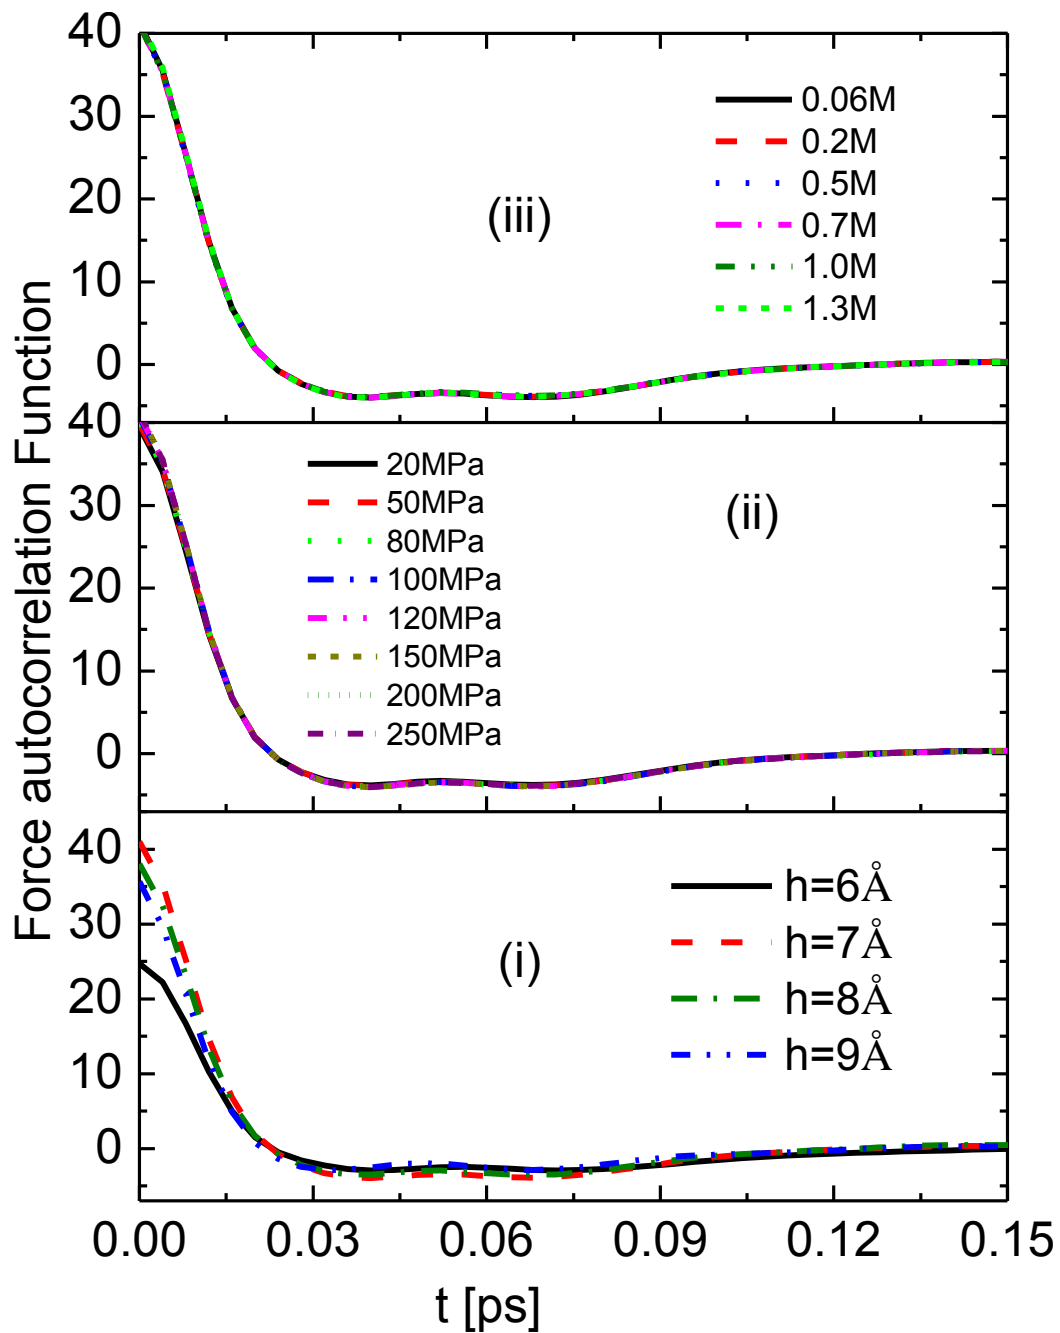

Fig.S3. Viscosity of water confined in graphene nanopores vs. (i) pore size [ $P=150\text{MPa}$ ,  $C=0.2\text{M}$ ], (ii) external pressure [ $h=7\text{\AA}$ ,  $C=0.2\text{M}$ ], and (iii) salt concentration [ $h=7\text{\AA}$ ,  $P=150\text{MPa}$ ]

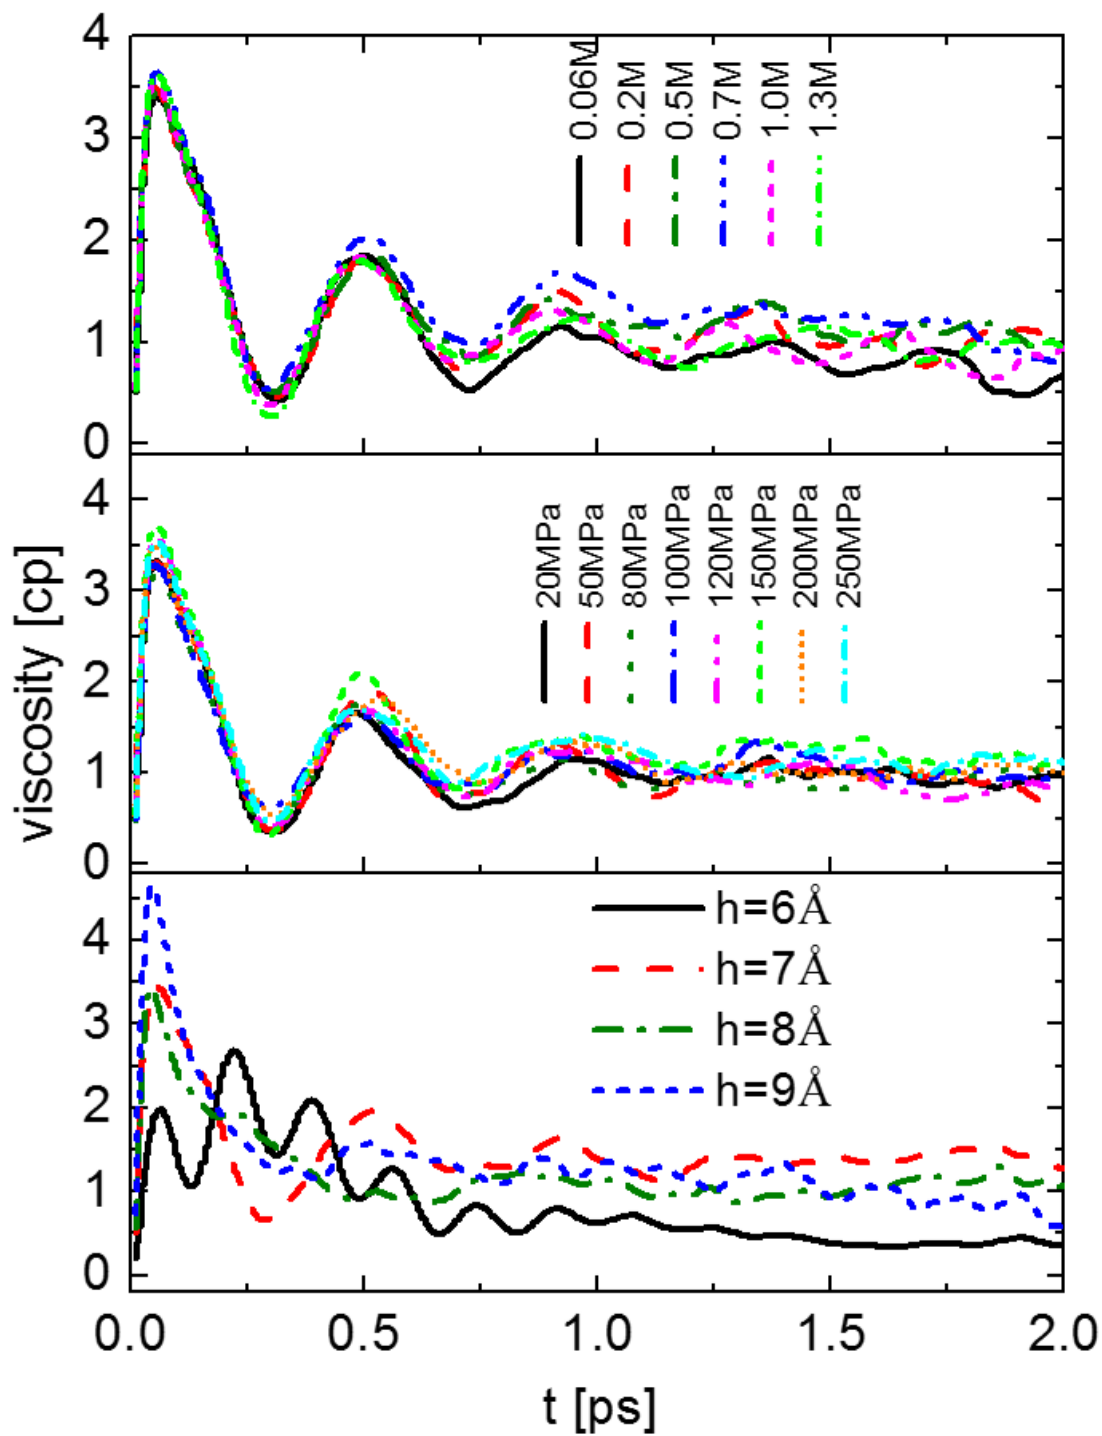

Fig.S4. Velocity autocorrelation function of water confined in graphene nanopores vs. (i) pore size [ $P=150\text{MPa}$ ,  $C=0.2\text{M}$ ], (ii) external pressure [ $h=7\text{\AA}$ ,  $C=0.2\text{M}$ ], and (iii) salt concentration [ $h=7\text{\AA}$ ,  $P=150\text{MPa}$ ].

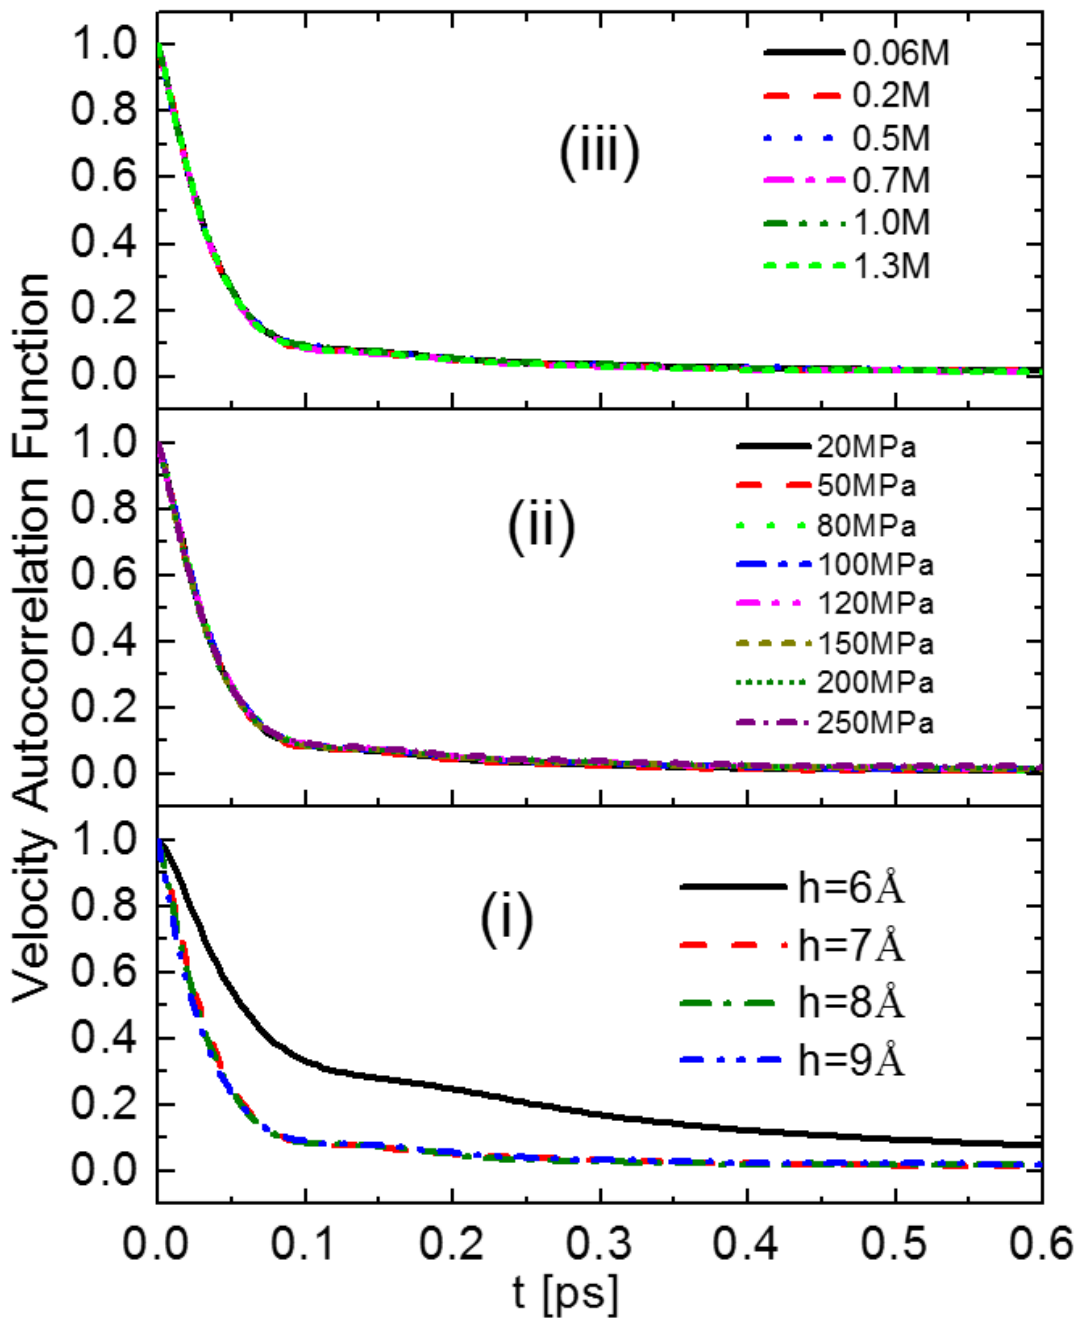

Supplement: c9cp04364k3.pdf [file c9cp04364k3.pdf]
